# Supplementary material
Source: publisher figshare collection journal article supplement (https://tandf.figshare.com/ndownloader/files/27424825)
Supplement: Supplementary file 1 [file 27424825]

## Sheet: Information
Supplemental material 1 - BRs Adherence Index (February 18th, 2020)
This file is organised in two tabs: Tab A. Annex II Parties; and Tab B. Other Annex I Parties. Each of these tabs presents the (1) data source; (2) scorecard; (3) coding results; (4) adherence score calculation; and (5) summary table respectively for the BRs of Annex II Parties and for the BRs of other Annex I Parties.

## Sheet: Annex II Parties
BRs Adherence Index – Annex II Parties
1. Data source
Technical review reports of the BR1: https://unfccc.int/process/transparency-and-reporting/reporting-and-review-under-the-convention/national-communications-and-biennial-reports--annex-i-parties/international-assessment-and-review/review-reports/technical-review-reports-of-first-biennial-reports
Technical review reports of the BR2: https://unfccc.int/process-and-meetings/transparency-and-reporting/reporting-and-review-under-the-convention/national-communications-and-biennial-reports-annex-i-parties/review-reports-of-national-communications-and-biennial-reports/review-reports-of-sixth-national
Technical review reports of the BR3: https://unfccc.int/process-and-meetings/transparency-and-reporting/reporting-and-review-under-the-convention/national-communications-and-biennial-reports-annex-i-parties/review-reports-of-national-communications-and-biennial-reports
2. Scorecard used to construct the Adherence Index of each section of a BR
	Gradation by the expert review teams	Score
Timeliness	Report submitted before the deadline	3
	Report submitted within six weeks after the due date	2
	Report submitted more than six weeks after the due date	1
	No submission	0
Completeness	Complete	3
	Mostly complete	2
	Partially complete	1
	Not complete	0
Transparency	Transparent	3
	Mostly transparent	2
	Partially transparent	1
	No submission	0
3. Coding
		Australia						Austria						Belgium						Canada						Denmark						European Union						Finland						France
		BR1		BR2		BR3		BR1		BR2		BR3		BR1		BR2		BR3		BR1		BR2		BR3		BR1		BR2		BR3		BR1		BR2		BR3		BR1		BR2		BR3		BR1		BR2		BR3
	Timeliness	3		3		3		1		3		3		2		3		3		3		2		3		2		2		3		2		3		3		3		3		3		3		3		3
		Completeness	Transparency	Completeness	Transparency	Completeness	Transparency	Completeness	Transparency	Completeness	Transparency	Completeness	Transparency	Completeness	Transparency	Completeness	Transparency	Completeness	Transparency	Completeness	Transparency	Completeness	Transparency	Completeness	Transparency	Completeness	Transparency	Completeness	Transparency	Completeness	Transparency	Completeness	Transparency	Completeness	Transparency	Completeness	Transparency	Completeness	Transparency	Completeness	Transparency	Completeness	Transparency	Completeness	Transparency	Completeness	Transparency	Completeness	Transparency
Sections	GHG emissions and trends	3	3	3	3	3	3	3	3	3	3	3	3	3	3	3	3	3	3	3	3	3	3	3	3	3	3	3	3	3	3	3	3	3	3	3	3	3	3	3	3	3	3	3	3	3	2	2	3
	Assumptions, conditions and methodologies related to the attainment of the quantified economy-wide emission reduction target	3	3	3	3	3	2	3	3	3	3	3	3	2	2	3	2	3	3	3	2	2	3	2	3	3	3	3	3	3	3	3	3	3	3	3	3	3	3	3	2	3	3	3	3	3	2	3	3
	Progress in achievement of targets, including projections	3	2	2	2	3	3	2	2	2	2	2	2	2	3	3	2	3	2	2	2	2	2	2	3	3	2	2	2	3	2	3	2	3	2	2	2	3	3	3	3	3	2	2	2	2	2	3	2
	Provision of support to developing country Parties	3	2	3	2	3	3	1	2	2	1	2	2	2	2	3	2	3	2	2	2	2	1	2	2	1	1	1	1	2	2	2	2	3	2	3	3	3	2	3	2	3	3	2	2	3	2	2	2
4. Adherence score calculation
		Australia						Austria						Belgium						Canada						Denmark						European Union						Finland						France
		BR1		BR2		BR3		BR1		BR2		BR3		BR1		BR2		BR3		BR1		BR2		BR3		BR1		BR2		BR3		BR1		BR2		BR3		BR1		BR2		BR3		BR1		BR2		BR3
Score for the section 'GHG emissions and trends'		100		100		100		86.6667		100		100		93.3333		100		100		100		93.3333		100		93.3333		93.3333		100		93.3333		100		100		100		100		100		100		86.6667		86.6667
Score for the section 'Assumptions, conditions and methodologies related to the attainment of the quantified economy-wide emission reduction target'		100		100		86.6667		86.6667		100		100		66.6667		86.6667		100		86.6667		80		86.6667		93.3333		93.3333		100		93.3333		100		100		100		86.6667		100		100		86.6667		100
Score for the section 'Progress in achievement of targets, including projections'		86.6667		73.3333		100		60		73.3333		73.3333		80		86.6667		86.6667		73.3333		66.6667		86.6667		80		66.6667		86.6667		80		86.6667		73.3333		100		100		86.6667		73.3333		73.3333		86.6667
Score for the section 'Provision of support to developing country Parties'		86.6667		86.6667		100		46.6667		60		73.3333		66.6667		86.6667		86.6667		73.3333		53.3333		73.3333		40		40		73.3333		66.6667		86.6667		100		86.6667		86.6667		100		73.3333		86.6667		73.3333
Overall adherence score		93.3333		90		96.6667		70		83.3333		86.6667		76.6667		90		93.3333		83.3333		73.3333		86.6667		76.6667		73.3333		90		83.3333		93.3333		93.3333		96.6667		93.3333		96.6667		86.6667		83.3333		86.6667
5. Summary table
		Overall adherence score				Adherence score per section of the BRs
						GHG emissions and trends				Assumptions, conditions and methodologies related to the attainment of the quantified economy-wide emission reduction target				Progress in achievement of targets, including projections				Provision of support to developing country Parties
		BR1	BR2	BR3	Average	BR1	BR2	BR3	Average	BR1	BR2	BR3	Average	BR1	BR2	BR3	Average	BR1	BR2	BR3	Average
Australia		93.3333	90	96.6667	93.3333	100	100	100	100	100	100	86.6667	95.5556	86.6667	73.3333	100	86.6667	86.6667	86.6667	100	91.1111
Austria		70	83.3333	86.6667	80	86.6667	100	100	95.5556	86.6667	100	100	95.5556	60	73.3333	73.3333	68.8889	46.6667	60	73.3333	60
Belgium		76.6667	90	93.3333	86.6667	93.3333	100	100	97.7778	66.6667	86.6667	100	84.4444	80	86.6667	86.6667	84.4444	66.6667	86.6667	86.6667	80
Canada		83.3333	73.3333	86.6667	81.1111	100	93.3333	100	97.7778	86.6667	80	86.6667	84.4444	73.3333	66.6667	86.6667	75.5556	73.3333	53.3333	73.3333	66.6667
Denmark		76.6667	73.3333	90	80	93.3333	93.3333	100	95.5556	93.3333	93.3333	100	95.5556	80	66.6667	86.6667	77.7778	40	40	73.3333	51.1111
European Union		83.3333	93.3333	93.3333	90	93.3333	100	100	97.7778	93.3333	100	100	97.7778	80	86.6667	73.3333	80	66.6667	86.6667	100	84.4444
Finland		96.6667	93.3333	96.6667	95.5556	100	100	100	100	100	86.6667	100	95.5556	100	100	86.6667	95.5556	86.6667	86.6667	100	91.1111
France		86.6667	83.3333	86.6667	85.5556	100	86.6667	86.6667	91.1111	100	86.6667	100	95.5556	73.3333	73.3333	86.6667	77.7778	73.3333	86.6667	73.3333	77.7778
Germany		86.6667	86.6667	96.6667	90	100	100	100	100	100	86.6667	100	95.5556	73.3333	73.3333	100	82.2222	73.3333	86.6667	86.6667	82.2222
Greece		93.3333	76.6667	90	86.6667	100	93.3333	100	97.7778	100	93.3333	100	97.7778	86.6667	80	86.6667	84.4444	86.6667	40	73.3333	66.6667
Iceland		70	60	66.6667	65.5556	86.6667	86.6667	86.6667	86.6667	86.6667	73.3333	73.3333	77.7778	46.6667	46.6667	60	51.1111	60	33.3333	46.6667	46.6667
Ireland		73.3333	73.3333	70	72.2222	86.6667	93.3333	73.3333	84.4444	86.6667	66.6667	86.6667	80	60	53.3333	60	57.7778	60	80	60	66.6667
Italy		80	86.6667	90	85.5556	93.3333	100	100	97.7778	93.3333	100	86.6667	93.3333	80	73.3333	86.6667	80	53.3333	73.3333	86.6667	71.1111
Japan		90	93.3333	83.3333	88.8889	100	100	100	100	100	100	86.6667	95.5556	73.3333	73.3333	73.3333	73.3333	86.6667	100	73.3333	86.6667
Luxembourg		60	66.6667	73.3333	66.6667	86.6667	86.6667	86.6667	86.6667	73.3333	86.6667	73.3333	77.7778	33.3333	46.6667	60	46.6667	46.6667	46.6667	73.3333	55.5556
Netherlands		93.3333	86.6667	86.6667	88.8889	100	100	100	100	100	100	100	100	100	73.3333	73.3333	82.2222	73.3333	73.3333	73.3333	73.3333
New Zealand		83.3333	86.6667	93.3333	87.7778	100	100	100	100	100	100	100	100	60	73.3333	73.3333	68.8889	73.3333	73.3333	100	82.2222
Norway		73.3333	83.3333	83.3333	80	86.6667	100	93.3333	93.3333	73.3333	86.6667	80	80	86.6667	73.3333	93.3333	84.4444	46.6667	73.3333	66.6667	62.2222
Portugal		76.6667	76.6667	90	81.1111	100	86.6667	100	95.5556	86.6667	86.6667	100	91.1111	73.3333	60	73.3333	68.8889	46.6667	73.3333	86.6667	68.8889
Spain		80	86.6667	90	85.5556	100	100	100	100	86.6667	100	86.6667	91.1111	86.6667	73.3333	73.3333	77.7778	46.6667	73.3333	100	73.3333
Sweden		86.6667	93.3333	86.6667	88.8889	100	100	100	100	100	100	86.6667	95.5556	73.3333	73.3333	86.6667	77.7778	73.3333	100	73.3333	82.2222
Switzerland		80	73.3333	93.3333	82.2222	93.3333	100	100	97.7778	93.3333	86.6667	100	93.3333	80	60	100	80	53.3333	46.6667	73.3333	57.7778
United Kingdom		90	83.3333	93.3333	88.8889	100	86.6667	100	95.5556	100	100	100	100	73.3333	60	86.6667	73.3333	86.6667	86.6667	86.6667	86.6667
United States of America		90	90	0	60	100	100	0	66.6667	100	100	0	66.6667	86.6667	86.6667	0	57.7778	73.3333	73.3333	0	48.8889
Average		82.2222	82.6389	84.0278	82.963	95.8333	96.1111	92.7778	94.9074	91.9444	91.6667	88.8889	90.8333	75.2778	71.1111	77.7778	74.7222	65.8333	71.6667	76.6667	71.3889
[truncated: 96 more columns]

## Sheet: Other Annex I Parties
BRs Adherence Index – Other Annex I Parties
1. Data source
Technical review reports of the BR1: https://unfccc.int/process/transparency-and-reporting/reporting-and-review-under-the-convention/national-communications-and-biennial-reports--annex-i-parties/international-assessment-and-review/review-reports/technical-review-reports-of-first-biennial-reports
Technical review reports of the BR2: https://unfccc.int/process-and-meetings/transparency-and-reporting/reporting-and-review-under-the-convention/national-communications-and-biennial-reports-annex-i-parties/review-reports-of-national-communications-and-biennial-reports/review-reports-of-sixth-national
Technical review reports of the BR3: https://unfccc.int/process-and-meetings/transparency-and-reporting/reporting-and-review-under-the-convention/national-communications-and-biennial-reports-annex-i-parties/review-reports-of-national-communications-and-biennial-reports
2. Scorecard
	Gradation by the expert review teams	Score
Timeliness	Report submitted before the deadline	3
	Report submitted within six weeks after the due date	2
	Report submitted more than six weeks after the due date	1
	No submission	0
Completeness	Complete	3
	Mostly complete	2
	Partially complete	1
	Not complete	0
Transparency	Transparent	3
	Mostly transparent	2
	Partially transparent	1
	No submission	0
3. Coding
		Belarus						Bulgaria						Croatia						Cyprus						Czech Republic						Estonia						Hungary						Kazakhstan
		BR1		BR2		BR3		BR1		BR2		BR3		BR1		BR2		BR3		BR1		BR2		BR3		BR1		BR2		BR3		BR1		BR2		BR3		BR1		BR2		BR3		BR1		BR2		BR3
	Timeliness	2		3		1		3		3		3		2		3		1		3		2		1		2		3		3		3		3		3		2		2		2		1		1		3
		Completeness	Transparency	Completeness	Transparency	Completeness	Transparency	Completeness	Transparency	Completeness	Transparency	Completeness	Transparency	Completeness	Transparency	Completeness	Transparency	Completeness	Transparency	Completeness	Transparency	Completeness	Transparency	Completeness	Transparency	Completeness	Transparency	Completeness	Transparency	Completeness	Transparency	Completeness	Transparency	Completeness	Transparency	Completeness	Transparency	Completeness	Transparency	Completeness	Transparency	Completeness	Transparency	Completeness	Transparency	Completeness	Transparency	Completeness	Transparency
Sections	GHG emissions and trends	2	3	3	3	Not yet reviewed		3	3	3	2	3	2	3	3	3	3	2	3	3	3	3	3	3	2	3	3	3	3	3	3	3	3	3	3	3	3	3	3	3	2	3	3	2	3	3	2	3	2
	Assumptions, conditions and methodologies related to the attainment of the quantified economy-wide emission reduction target	3	1	3	2	Not yet reviewed		2	2	3	2	3	3	3	3	3	3	3	3	1	3	2	2	3	2	3	3	3	2	3	3	3	2	3	3	3	2	3	3	3	2	3	3	3	2	3	2	3	3
	Progress in achievement of targets, including projections	1	1	1	1	Not yet reviewed		1	2	2	1	2	2	2	3	2	2	1	2	1	3	2	2	2	3	3	2	2	2	3	2	2	2	3	2	3	2	2	3	2	1	2	2	1	1	3	1	2	2
4. Adherence score calculation
		Belarus						Bulgaria						Croatia						Cyprus						Czech Republic						Estonia						Hungary						Kazakhstan
		BR1		BR2		BR3		BR1		BR2		BR3		BR1		BR2		BR3		BR1		BR2		BR3		BR1		BR2		BR3		BR1		BR2		BR3		BR1		BR2		BR3		BR1		BR2		BR3
Score for the section 'GHG emissions and trends'		80		100		Not yet reviewed		100		86.6667		86.6667		93.3333		100		73.3333		100		93.3333		73.3333		93.3333		100		100		100		100		100		93.3333		80		93.3333		73.3333		73.3333		86.6667
Score for the section 'Assumptions, conditions and methodologies related to the attainment of the quantified economy-wide emission reduction target'		66.6667		86.6667		Not yet reviewed		73.3333		86.6667		100		93.3333		100		86.6667		73.3333		66.6667		73.3333		93.3333		86.6667		100		86.6667		100		86.6667		93.3333		80		93.3333		73.3333		73.3333		100
Score for the section 'Progress in achievement of targets, including projections'		40		46.6667		Not yet reviewed		60		60		73.3333		80		73.3333		46.6667		73.3333		66.6667		73.3333		80		73.3333		86.6667		73.3333		86.6667		86.6667		80		53.3333		66.6667		33.3333		60		73.3333
Overall adherence score		62.2222		77.7778		Not yet reviewed		77.7778		77.7778		86.6667		88.8889		91.1111		68.8889		82.2222		75.5556		73.3333		88.8889		86.6667		95.5556		86.6667		95.5556		91.1111		88.8889		71.1111		84.4444		60		68.8889		86.6667
5. Summary table
		Overall adherence score				Adherence score per section of the BRs
						GHG emissions and trends				Assumptions, conditions and methodologies related to the attainment of the quantified economy-wide emission reduction target				Progress in achievement of targets, including projections
		BR1	BR2	BR3	Average	BR1	BR2	BR3	Average	BR1	BR2	BR3	Average	BR1	BR2	BR3	Average
Belarus		62.2222	77.7778	Not yet reviewed	70	80	100	Not yet reviewed	90	66.6667	86.6667	Not yet reviewed	76.6667	40	46.6667	Not yet reviewed	43.3333
Bulgaria		77.7778	77.7778	86.6667	80.7407	100	86.6667	86.6667	91.1111	73.3333	86.6667	100	86.6667	60	60	73.3333	64.4444
Croatia		88.8889	91.1111	68.8889	82.963	93.3333	100	73.3333	88.8889	93.3333	100	86.6667	93.3333	80	73.3333	46.6667	66.6667
Cyprus		82.2222	75.5556	73.3333	77.037	100	93.3333	73.3333	88.8889	73.3333	66.6667	73.3333	71.1111	73.3333	66.6667	73.3333	71.1111
Czech Republic		88.8889	86.6667	95.5556	90.3704	93.3333	100	100	97.7778	93.3333	86.6667	100	93.3333	80	73.3333	86.6667	80
Estonia		86.6667	95.5556	91.1111	91.1111	100	100	100	100	86.6667	100	86.6667	91.1111	73.3333	86.6667	86.6667	82.2222
Hungary		88.8889	71.1111	84.4444	81.4815	93.3333	80	93.3333	88.8889	93.3333	80	93.3333	88.8889	80	53.3333	66.6667	66.6667
Kazakhstan		60	68.8889	86.6667	71.8519	73.3333	73.3333	86.6667	77.7778	73.3333	73.3333	100	82.2222	33.3333	60	73.3333	55.5556
Latvia		86.6667	86.6667	86.6667	86.6667	100	100	100	100	86.6667	86.6667	86.6667	86.6667	73.3333	73.3333	73.3333	73.3333
Liechtenstein		68.8889	75.5556	95.5556	80	86.6667	80	100	88.8889	73.3333	93.3333	100	88.8889	46.6667	53.3333	86.6667	62.2222
Lithuania		88.8889	86.6667	91.1111	88.8889	93.3333	100	100	97.7778	93.3333	86.6667	86.6667	88.8889	80	73.3333	86.6667	80
Malta		77.7778	75.5556	62.2222	71.8519	73.3333	80	66.6667	73.3333	86.6667	80	66.6667	77.7778	73.3333	66.6667	53.3333	64.4444
Monaco		82.2222	60	66.6667	69.6296	86.6667	73.3333	80	80	86.6667	60	66.6667	71.1111	73.3333	46.6667	53.3333	57.7778
Poland		48.8889	86.6667	91.1111	75.5556	66.6667	100	100	88.8889	40	86.6667	100	75.5556	40	73.3333	73.3333	62.2222
Romania		100	77.7778	91.1111	89.6296	100	73.3333	100	91.1111	100	86.6667	86.6667	91.1111	100	73.3333	86.6667	86.6667
Russian Federation		66.6667	77.7778	86.6667	77.037	93.3333	86.6667	100	93.3333	66.6667	100	100	88.8889	40	46.6667	60	48.8889
Slovakia		84.4444	77.7778	91.1111	84.4444	93.3333	86.6667	100	93.3333	93.3333	86.6667	86.6667	88.8889	66.6667	60	86.6667	71.1111
Slovenia		77.7778	73.3333	73.3333	74.8148	86.6667	86.6667	86.6667	86.6667	73.3333	73.3333	73.3333	73.3333	73.3333	60	60	64.4444
Turkey*		86.6667	93.3333	100	93.3333	86.6667	93.3333	100	93.3333
Ukraine		73.3333	0	0	24.4444	86.6667	0	0	28.8889	73.3333	0	0	24.4444	60	0	0	20
Average		78.8889	75.7778	80.117	78.0926	89.3333	84.6667	86.6667	86.9444	80.3509	80	82.963	80.9942	65.614	60.3509	68.1481	64.269
*Turkey is an Annex I Party with no GHG emission reduction target and is thus not obliged to report on assumptions, conditions and methodologies related to attainment of a quantified economy-wide emission reduction target and progress in achievement of targets
[truncated: 72 more columns]
